# Supplementary material
Source: bioRxiv or medRxiv preprint supplement (https://www.biorxiv.org/highwire/filestream/118640/field_highwire_adjunct_files/0/391417-1.pdf)
Supplement: Supplementary file [file 391417-1.pdf]

## Supplementary information for:

### Hydrogenotrophic methanogenesis in archaeal phylum Verstraetearchaeota reveals the shared ancestry of all methanogens

Bojk A. Berghuis<sup>1</sup>, Feiqiao Brian Yu<sup>1,2</sup>, Frederik Schulz<sup>3</sup>, Paul Blainey<sup>4</sup>,  
Tanja Woyke<sup>3</sup>, Stephen R. Quake<sup>1,2,5</sup>

<sup>1</sup>Department of Bioengineering, Stanford University, Stanford, United States

<sup>2</sup>Chan Zuckerberg Biohub, San Francisco, United States

<sup>3</sup>Department of Energy Joint Genome Institute, Walnut Creek, United States

<sup>4</sup>MIT Department of Biological Engineering and Broad Institute of Harvard and MIT

<sup>5</sup>Department of Applied Physics, Stanford University, Stanford, United States

## List of figures

1. Obsidian Pool (mini-)metagenomics pipeline and dataset
2. Key genes in Obsidian pool genomes
3. Genes related to energy conservation in methanogenic and related orders (extension of Fig. 2).
4. Key methanogenesis/WLP genes in the clades of the Verstraetearchaeota, Ignisphaera, and Bathyarchaeota
5. KEGG-based comparison of Verstraetearchaeota orders
6. Verstraetearchaeota ANI analysis
7. Relative presence of WLP/methanogenesis genes in all methanogenic orders
8. Gene tree of MtrG
9. Gene tree of MtrB
10. Gene tree of MtrH
11. Gene tree of McrA
12. Gene tree of CdhD
13. Gene tree of CdhG
14. Gene tree of OP CDH gene clusters (concatenated alignment)
15. Gene tree of trimethylamine methyltransferase (MttB).

## List of tables

1. Obsidian Pool sample information
2. Genes used for methanogenesis pathway reconstruction

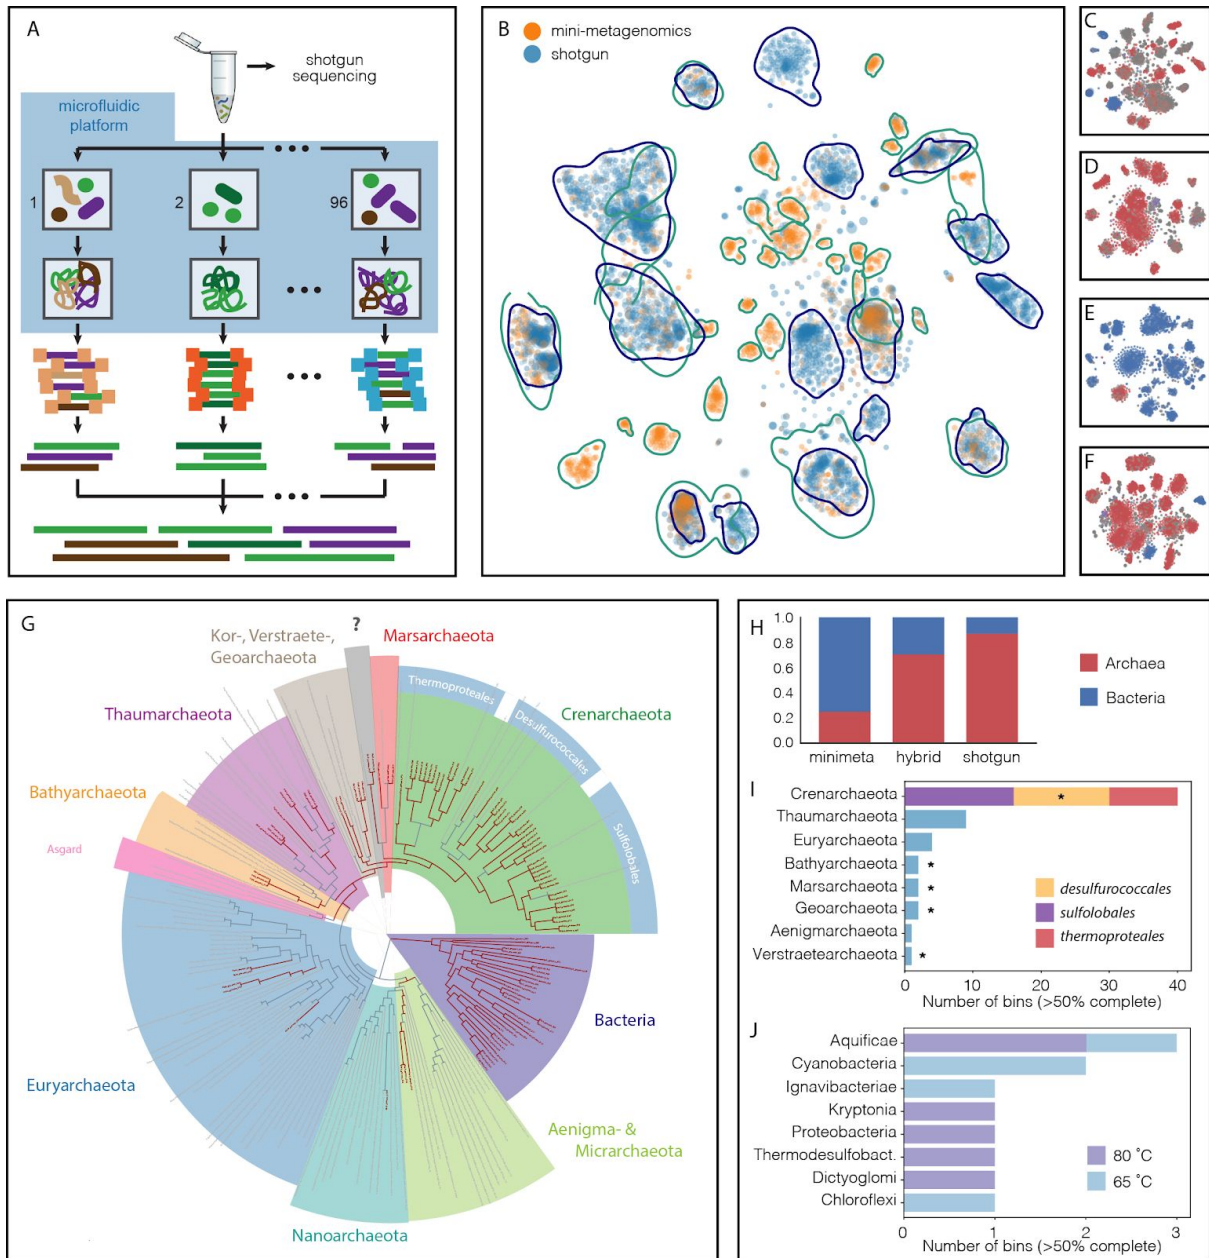

**Figure S1. Obsidian Pool (mini-)metagenomics pipeline and dataset.** (A) Mini-metagenomic sequencing. (B) 5-mer-based contig clustering with tSNE, obsidian 3; mini-metagenomic (orange) and metagenomic (blue) contigs shown. (C-F) Obsidian Pool samples 2,4,5,6 resp., showing contigs of archaeal (red), bacterial (blue) and unknown (gray) origin. (G) Phylogenomic tree of OP archaea (red) and publicly available reference genomes (gray) based on a concatenated alignment of 56 marker genes. (H) Fraction of archaeal (red) or bacterial (blue) bins based on sequencing method. (I,J) Phylogeny vs. number of high-quality bins, phyla containing novel phylogeny are indicated with (\*).

Table S1. Yellowstone National Park, Obsidian Pool, sample information

|                                             | Sample #1                       | Sample #2  | Sample #3  | Sample #4  | Sample #5  |
|---------------------------------------------|---------------------------------|------------|------------|------------|------------|
| Sample area                                 | Obsidian Pool, mud volcano area |            |            |            |            |
| Sample type                                 | sediment                        |            |            |            |            |
| Location                                    | 44.61 N, 110.44 W               |            |            |            |            |
| Location type                               | hot spring                      |            |            |            |            |
| Temperature (C)                             | 79                              | 79         | 79         | 65         | 78         |
| pH                                          | 5                               | 5          | 5          | 5          | 5          |
| IMG genome ID                               | 3300017482                      | 3300017562 | 3300017469 | 3300017461 | 3300017696 |
| Shotgun number of reads (millions)          | 44                              | 20         | 49         | 6.56       | 104        |
| Mini-metagenomic number of reads (millions) | 323                             | 148        | 146        | 191        | 151        |
| reads per microfluidic chamber (millions)   | 1.68                            | 1.61       | 1.59       | 2.08       | 1.64       |
| Number of contigs mini-m (>5 kbp)           | 1318                            | 1994       | 164        | 2427       | 16         |
| Number of contigs total (>5 kbp)            | 6956                            | 6010       | 4931       | 4401       | 7170       |

Table S2. List of genes used for methanogenesis pathway reconstruction.

| gene | subunits       | name                                                          | pathway                                          |
|------|----------------|---------------------------------------------------------------|--------------------------------------------------|
| atp  | ABCDEF         | archaeal type H+ATPase                                        | energy metabolism                                |
| mcr  | ABGCD          | methyl coenzyme M reductase                                   | methanogenesis                                   |
| mtr  | ABCDEFGH       | methyl-H4MPT:coenzyme M methyltransferase                     | methanogenesis                                   |
| hdr  | ABCDE          | heterodisulfide reductase                                     | methanogenesis                                   |
| flp  | D              | methyl-viologen-reducing hydrogenase                          | methanogenesis                                   |
| fae  |                | formaldehyde activating enzyme                                | methanogenesis                                   |
| cdh  | ABGDE          | CO dehydrogenase/acetyl-CoA synthase                          | WLP                                              |
| frh  | ABGD           | F420-reducing hydrogenase                                     | WLP                                              |
| fwd  | ABCDE          | formylmethanofuran dehydrogenase                              | WLP                                              |
| flr  |                | formylmethanofuran:H4MPT formyltransferase                    | WLP                                              |
| mch  |                | Methenyltetrahydromethanopterin cyclohydrolase                | WLP                                              |
| mtd  |                | F420-dependent methylenetetrahydromethanopterin dehydrogenase | WLP                                              |
| mer  |                | methylene tetrahydromethanopterin reductase                   | WLP                                              |
| eha  | ABCEFGHM       | energy converting hydrogenase A                               | energy conservation (methanogenesis related)     |
| ehb  | ABCDHILMNPQ    | energy converting hydrogenase B                               | energy conservation (methanogenesis related)     |
| nfh  | SLG            | Ni,Fe hydrogenase III                                         | energy conservation (methanogenesis related)     |
| nuo  | ABCDEFGHIJKLMN | NADH-ubiquinone oxidoreductase                                | ferredoxin regeneration (methanogenesis related) |
| mtmB |                | monomethylamine methyltransferase                             | methylotrophic methanogenesis related            |
| mtbC |                | dimethylamine methyltransferase                               | methylotrophic methanogenesis related            |
| mttB |                | Trimethylamine:corrinoid methyltransferase                    | methylotrophic methanogenesis related            |
| mtaB |                | methanol-cobalamin methyltransferase                          | methylotrophic methanogenesis related            |
| rgyr |                | reverse gyrase                                                | thermophilicity marker                           |
| hco  | I,II           | heme-copper cytochrome oxidase                                | aerobic metabolism marker                        |



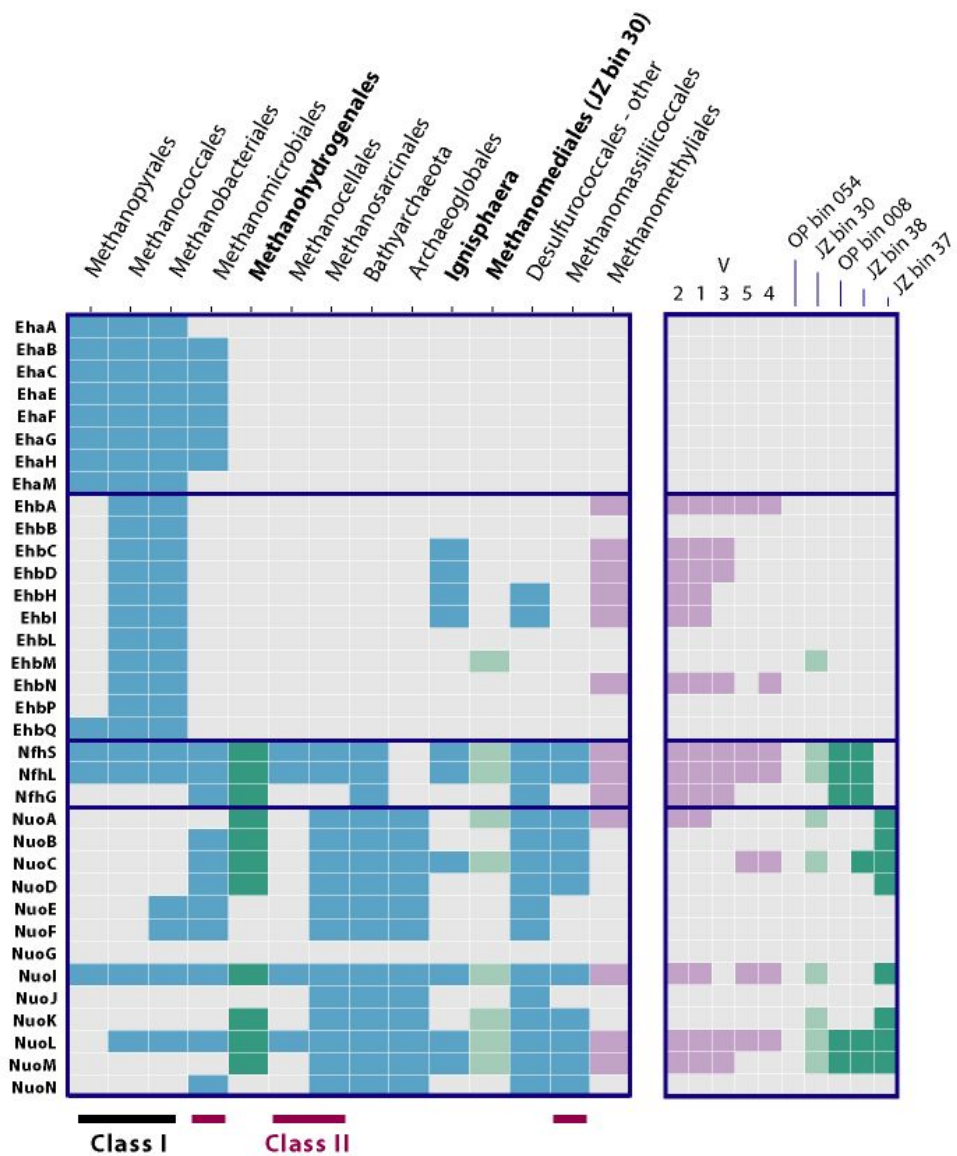

Figure S3. Genes related to energy conservation in methanogenic and related orders (extension of Fig. 2).

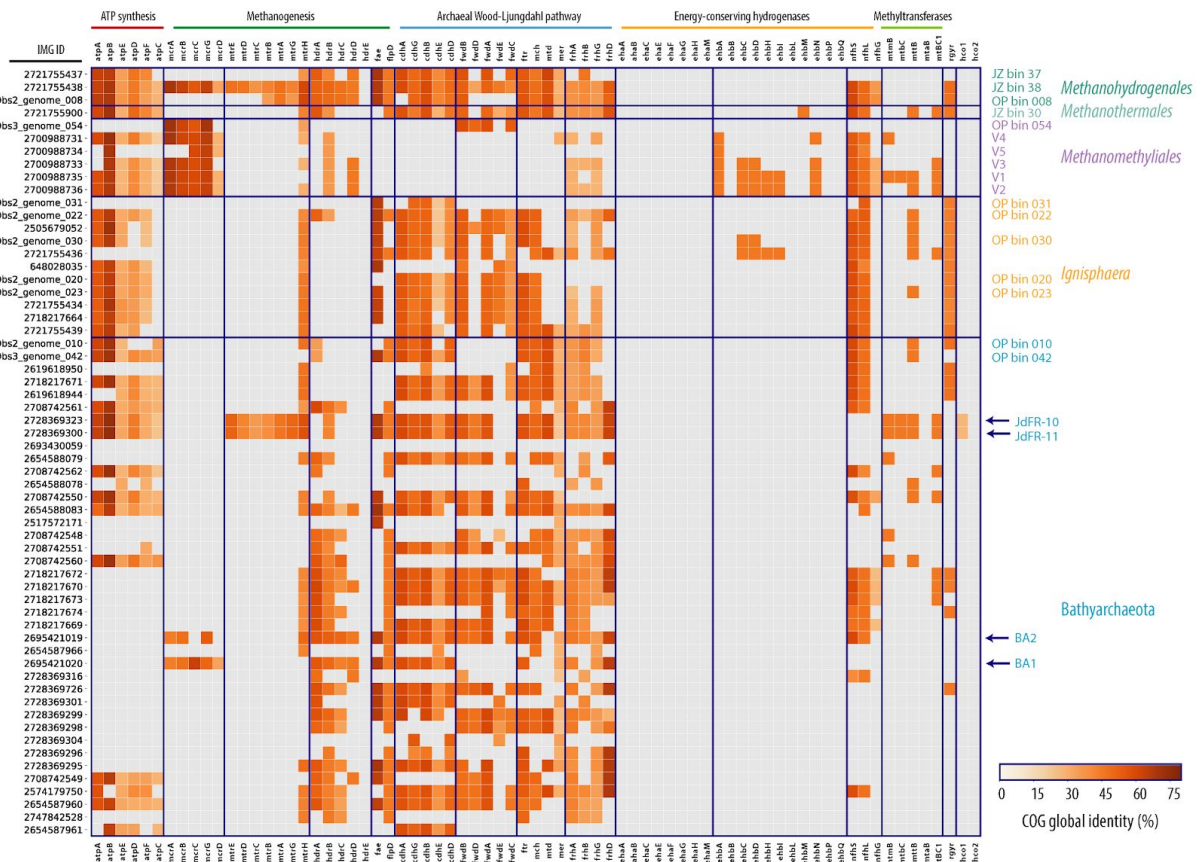

**Fig. S4. Key WLP and methanogenesis genes in Obsidian Pool clades of the Bathyarchaeota, Ignisphaera and Verstraetearchaeota.** The presence (orange) or absence (gray) of gene homologues and/or subunits of gene clusters involved in methanogenesis (*mcr*, *mtr*, *hdr*), the Wood-Ljungdahl pathway (*cdh*, *fwd*, *frt*, *mch*, *mtd*, *mer*, *frh*, *por*), related processes (*atp*, *ech*, methyltransferases), and others (see **Table 1** for details). Presence shaded by COG percent identity of the homologue. Non-Euryarchaeal methanogenic genomes reported indicated in the Bathyarchaeota (BA1,BA2; [Evans et al. 2015](#)) and Verstraetearchaeota (V1-5; [Vanwonterghem et al. 2016](#)) clades. Euryarchaeal genomes shown as reference.

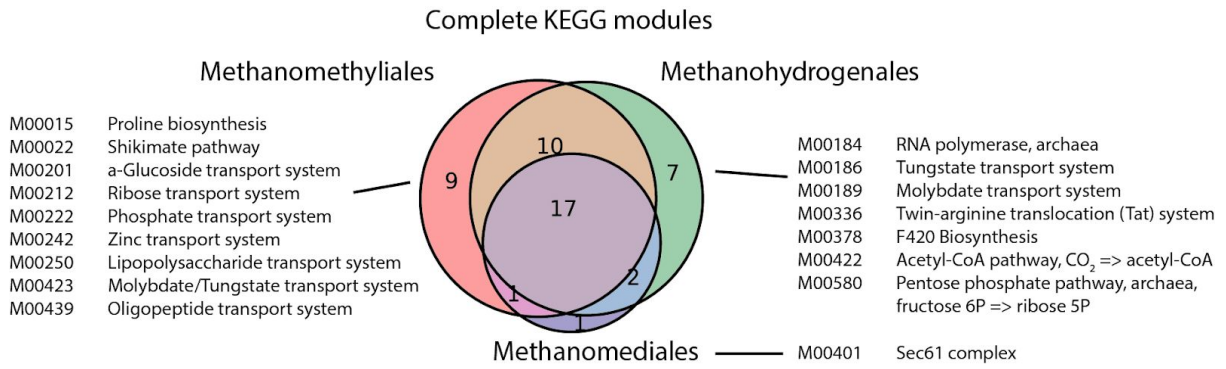

Figure S5. Complete KEGG modules unique to the 3 verstraetearchaeotal orders.

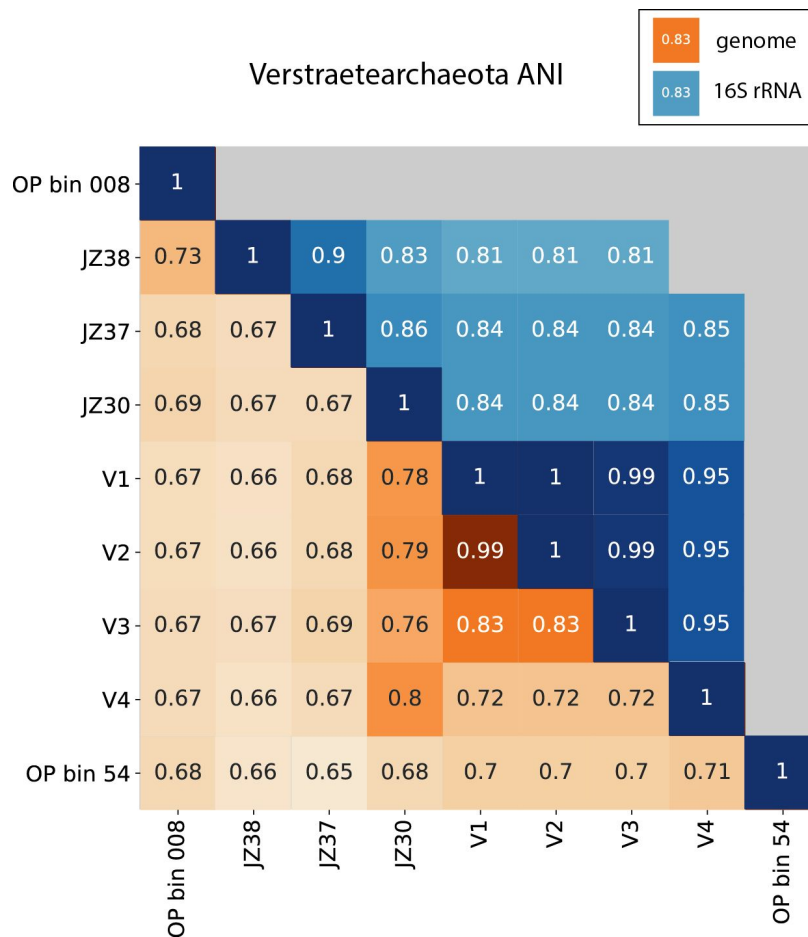

Fig S6. Pairwise average nucleotide identity (ANI) of the Verstraetearchaeota. 16S rRNA is not present in OP bin 008 and OP bin 54, partially present in JZ bin 38 (bp 1-512) and V4 (bp 890-1500). All other genomes have full length 16S rRNA.

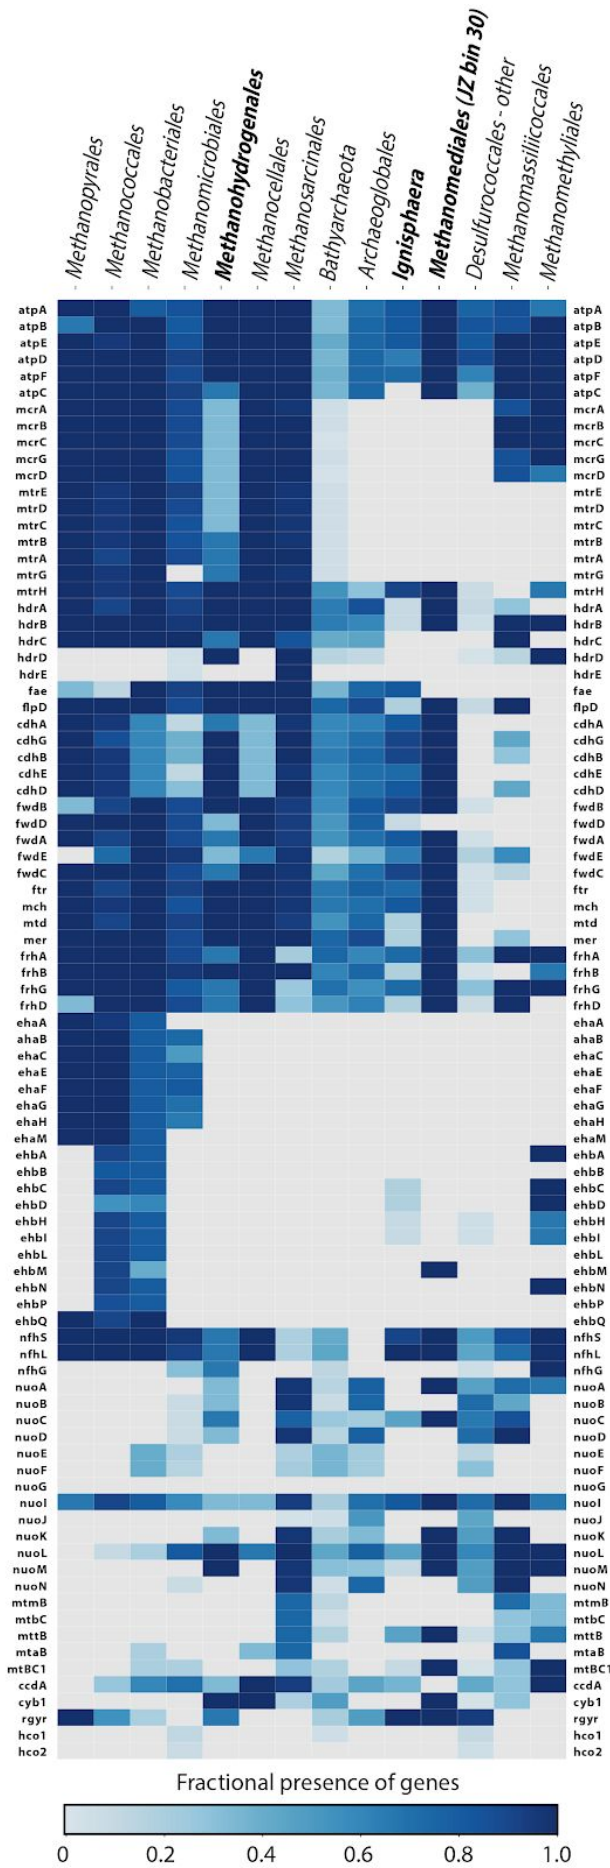

Figure S7. Presence of genes associated with methanogenesis and the WLP for all methanogenic orders, Archaeoglobales, Ignisphaera and other Desulfurococcales, shown as a fraction of the number of genomes in a clade containing the genes.



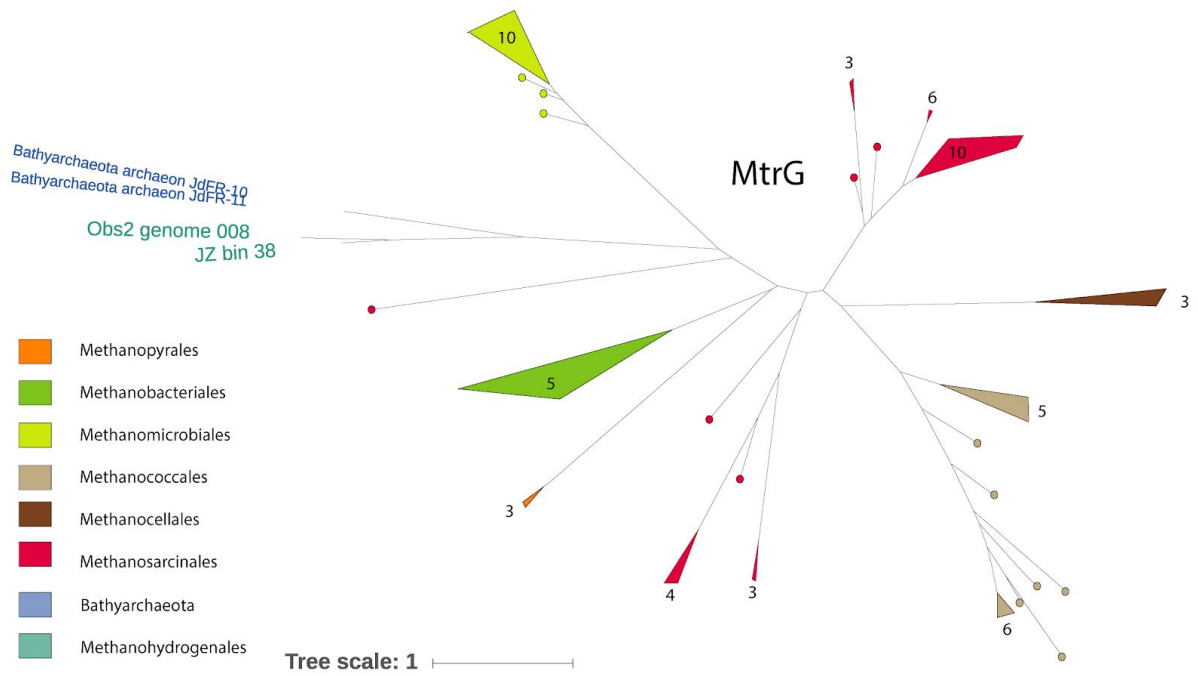

Fig S8. Gene tree of MtrG

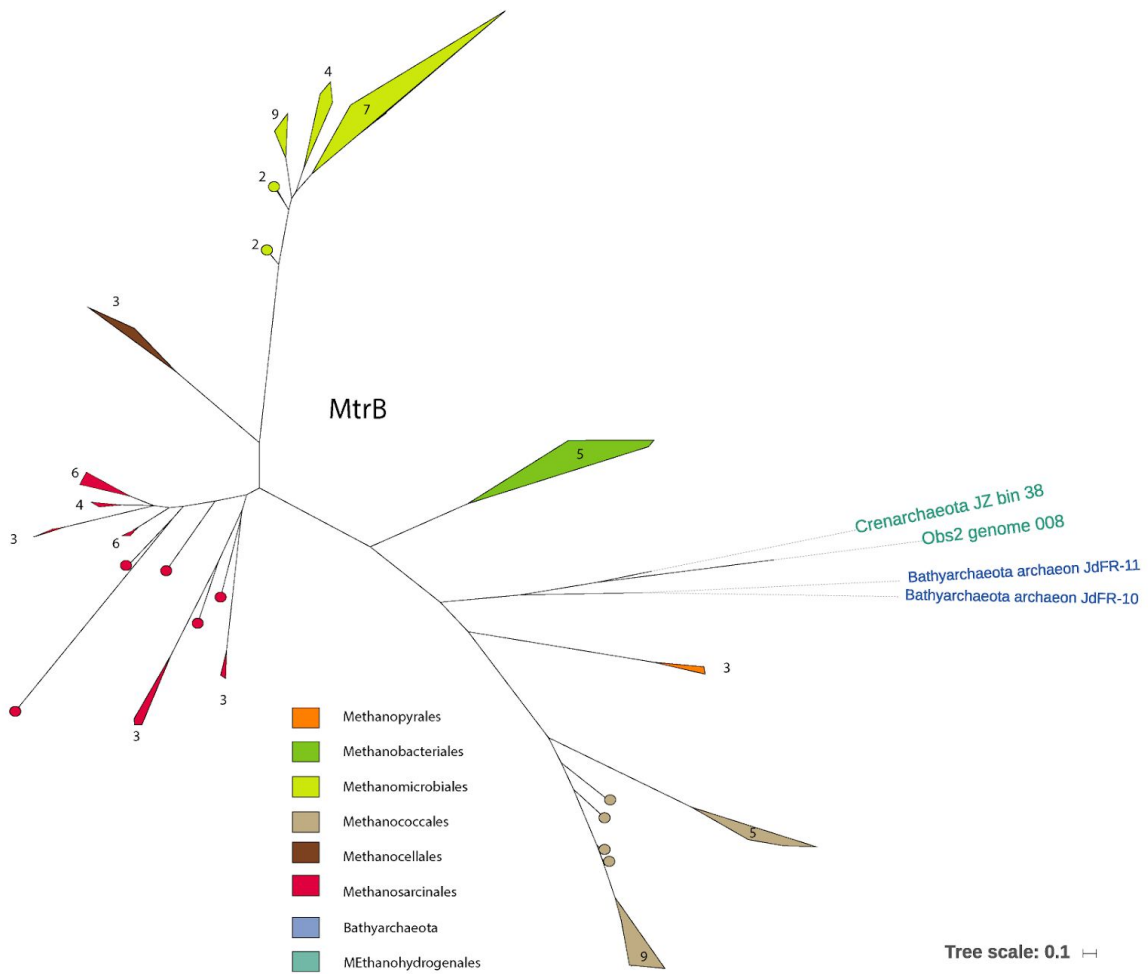

Figure S9. Phylogeny of MtrB.

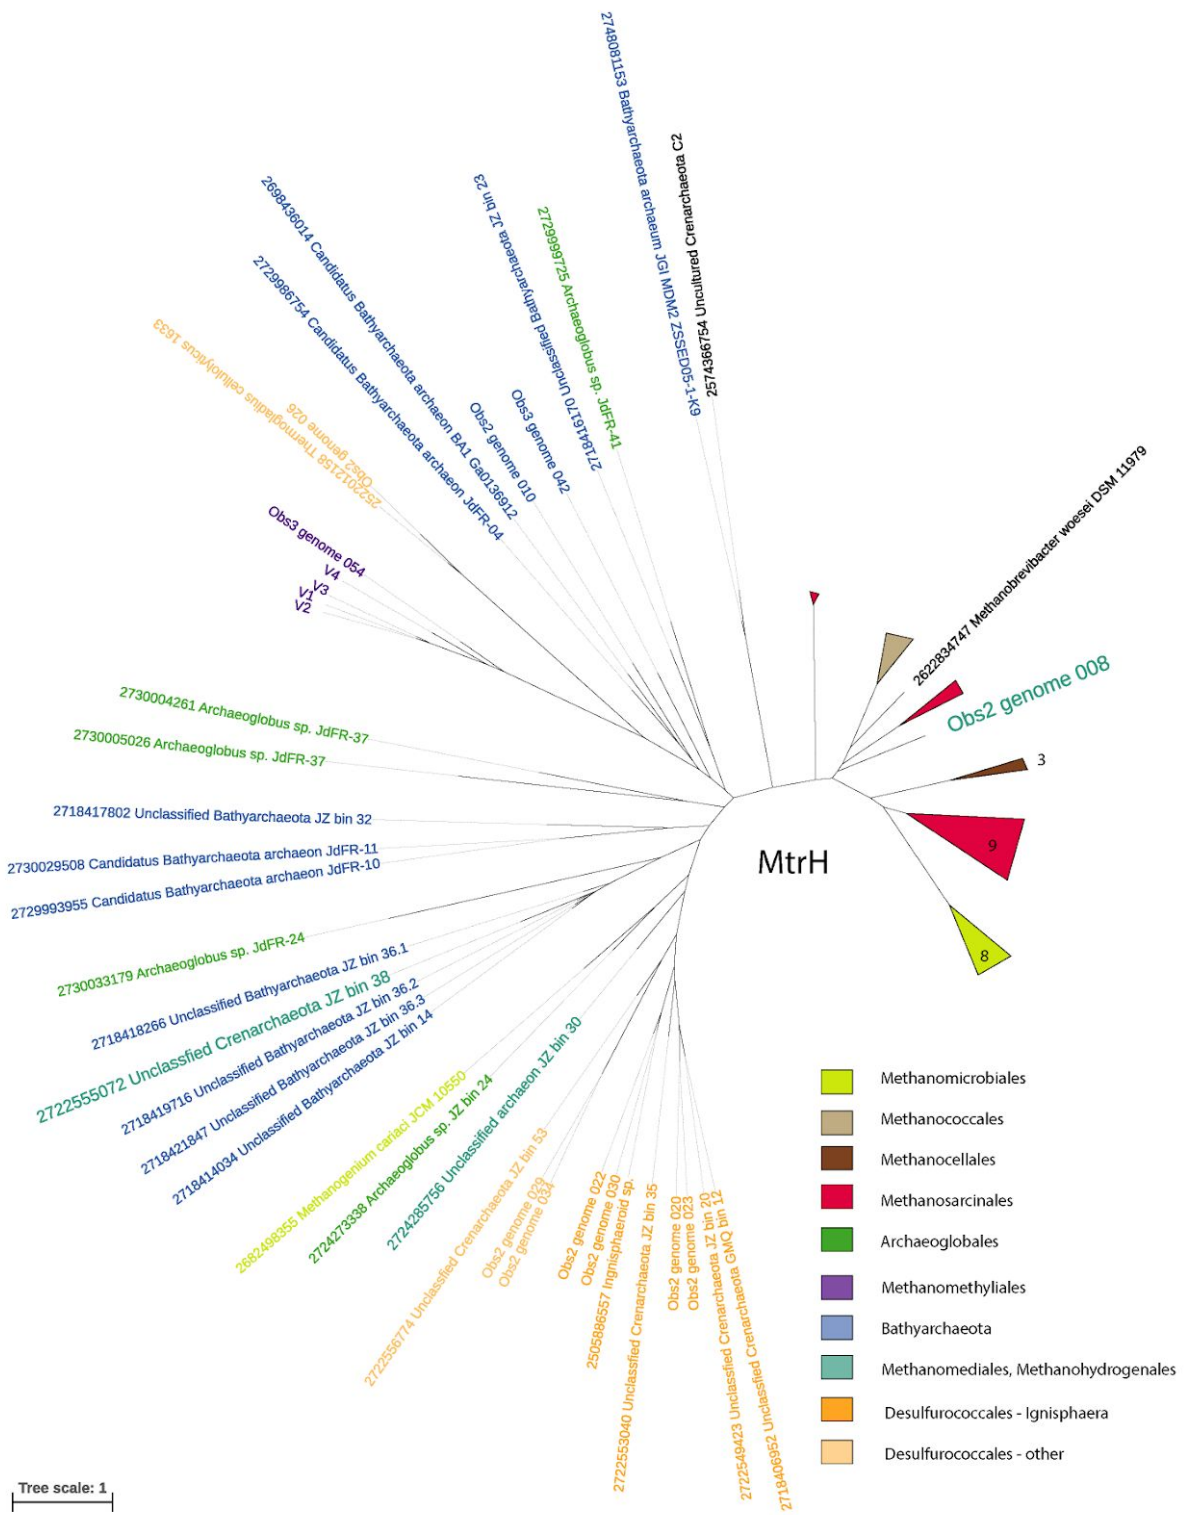

Figure S10. Phylogeny of mtrH

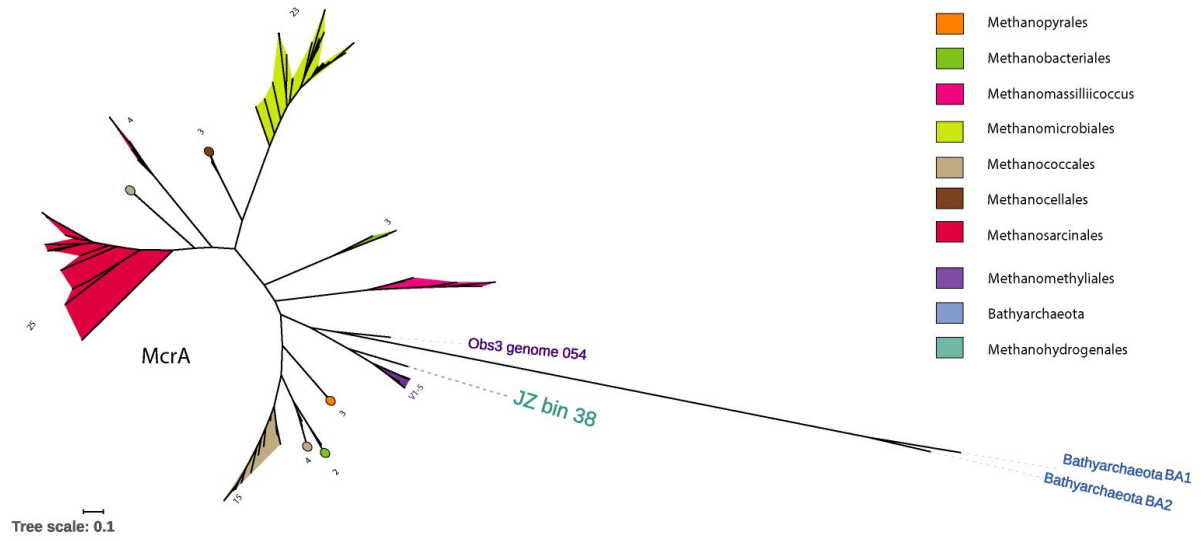

Fig S11. Phylogeny of McrA

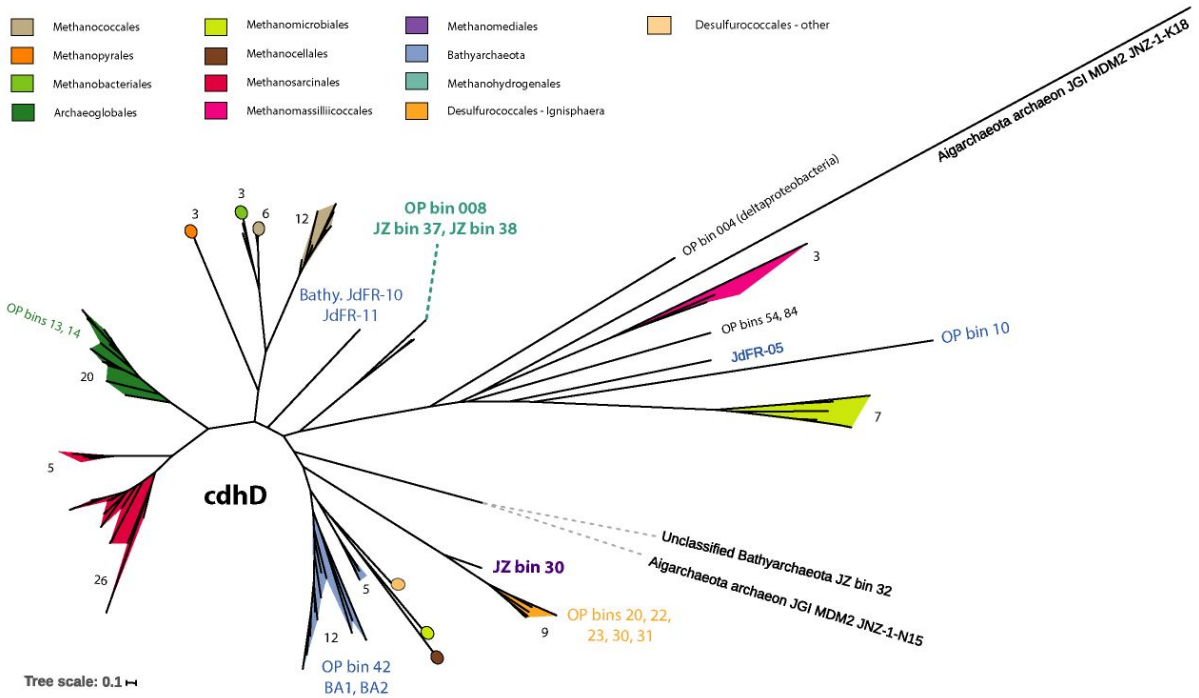

Fig. S12. Tree of CdhD.

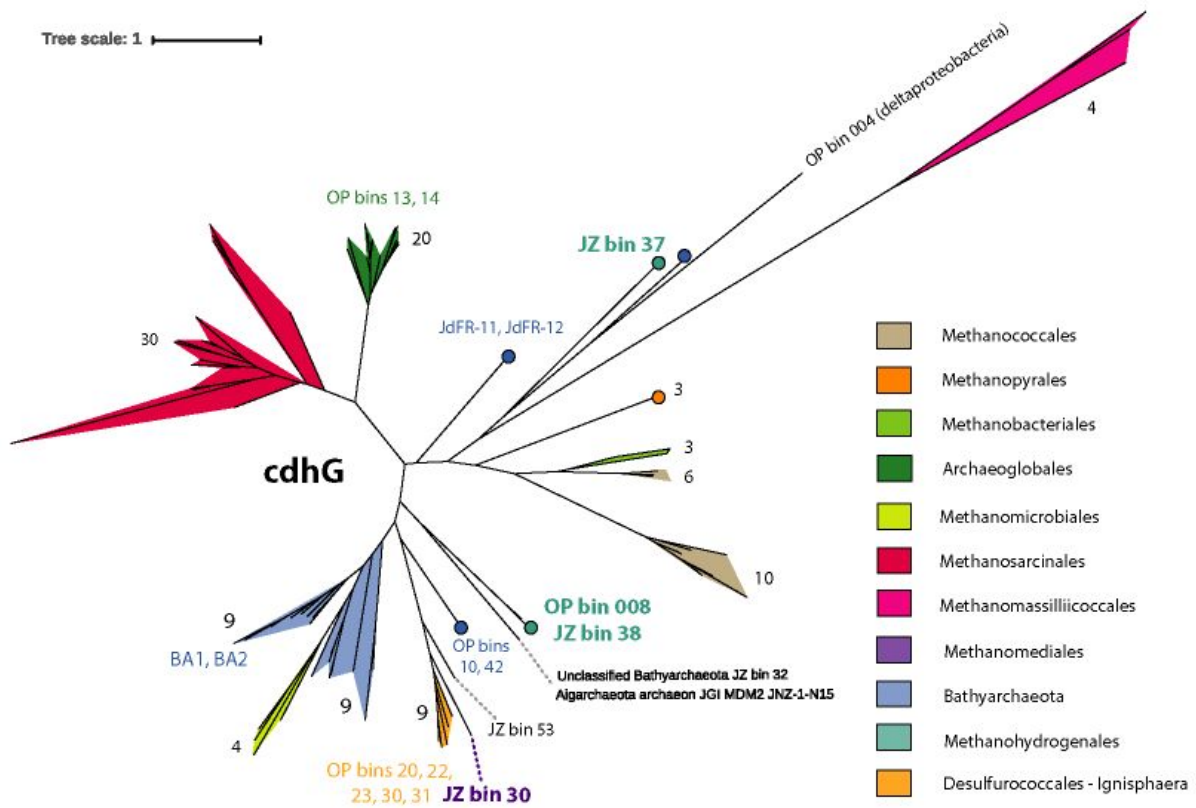

Fig. S13. Tree of CdhG.

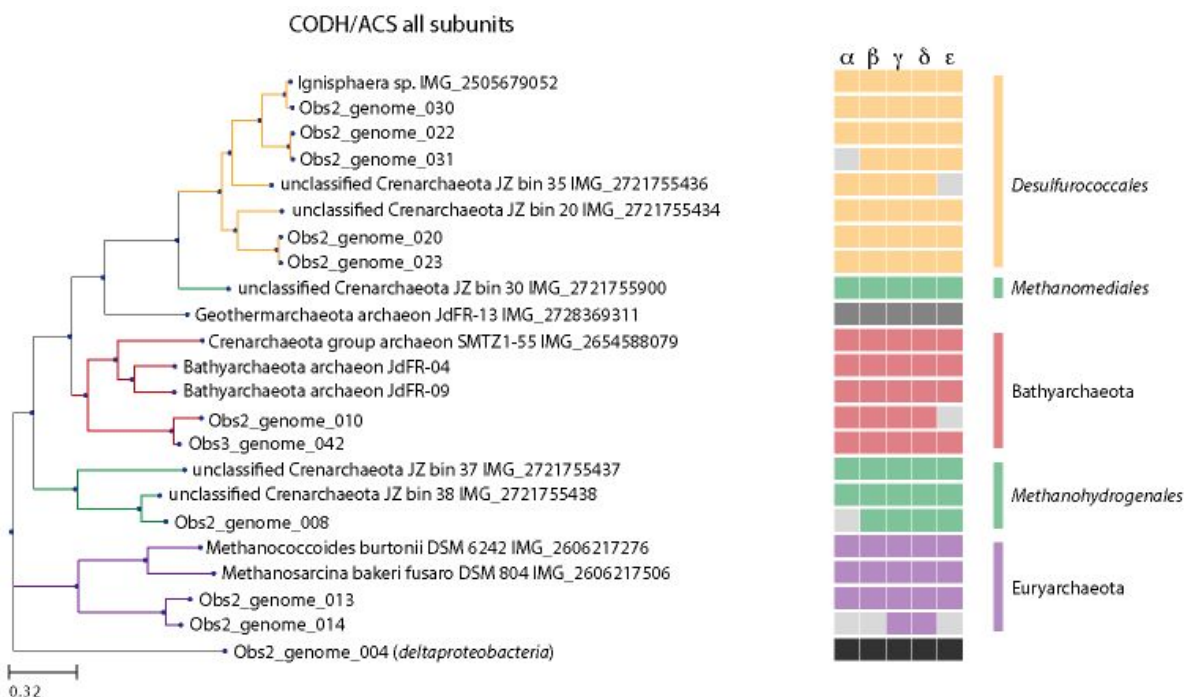

Figure S14. Phylogeny of Obsidian Pool genomes containing Cdh, as calculated from the concatenated alignment of the subunits.

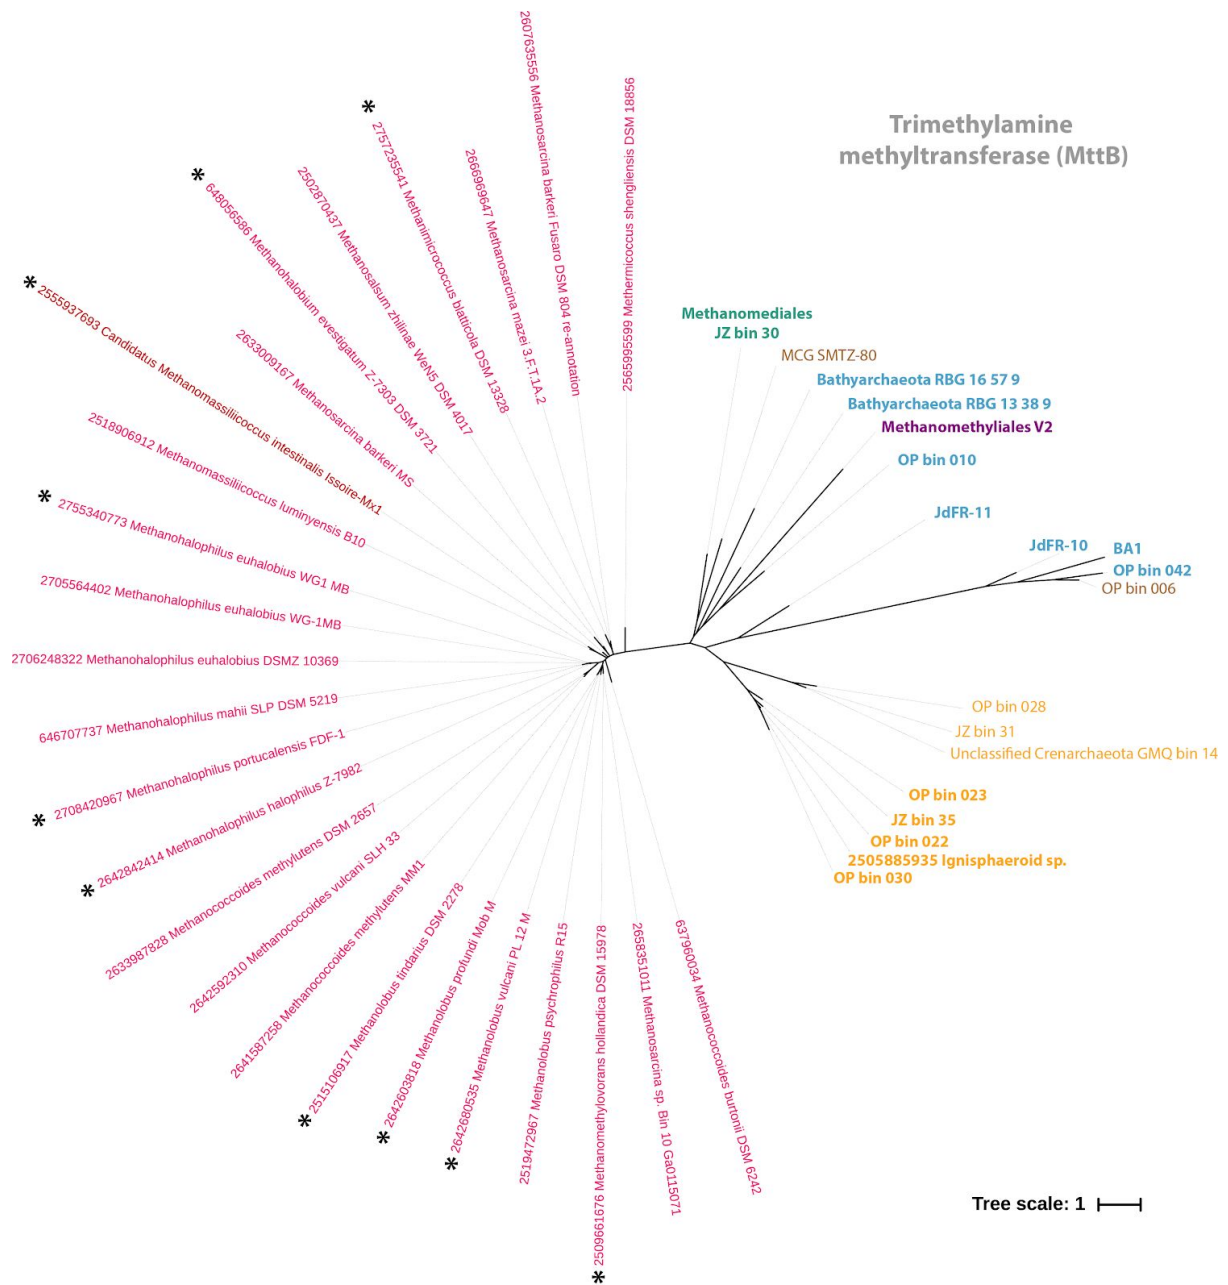

**Figure S15. Gene tree of trimethylamine methyltransferase (MttB).** The Euryarchaeota (*Methanosarcinales* (pink) and *Methanomassiliicoccales* (red)) form a tight clade, whereas members of the TACK superphylum are more divergent. Shown are *Methanomediales* (green), *Methanomethyliales* (purple), Bathyarchaeota (blue), *Ignisphaera* (yellow, bold), other *Desulfurococcales* (yellow) and other Crenarchaeota (brown). Amino acid sequences containing pyrrolysine (O) are indicated with a \*.
